# Supplementary material for: Minimally Invasive Facetectomy and Fusion for Resection of Extensive Dumbbell Tumors in the Lumbar Spine
Source: MDPI journal article supplement (doi:10.3390/medicina58111613), 2022-11-08
Supplement: s1 [file s1]

**Supplement Table S1:** patients' data, LOS: length of hospital stay, EOR: extents of resection, GTR: gross total resection, STR: subtotal resection.

| patient | surgery       | Age (years) | Pathology                         | Duration of surgery (h) | Eden Type | Tumor Volume (ml) | Treatment status | Blood loss (ml) | EOR | Location | Macnab score | LOS (days) | Symptoms                 |
|---------|---------------|-------------|-----------------------------------|-------------------------|-----------|-------------------|------------------|-----------------|-----|----------|--------------|------------|--------------------------|
| 1       | Facet-sparing | 43          | Schwannoma (WHO grade I)          | 2,3                     | 3         | 28,9              | Progression      | 50              | STR | L 2-3    | 4            | 4          | Back pain, sciatica      |
| 2       | Facetectomy   | 62          | Hemangiopericytoma (WHO grade II) | 4,2                     | 3         | 9,64              | Progression      | 1600            | GTR | D 12-L 1 | 4            | 6          | incomplete brown sequard |
| 3       | Facet-sparing | 62          | Hemangiopericytoma (WHO grade II) | 4,2                     | 3         | 39,1              | De novo          | 1500            | STR | D 12-L 1 | 3            | 8          | Back pain, sciatica      |
| 4       | Facetectomy   | 29          | Schwannoma (WHO grade I)          | 3,7                     | 3         | 2,16              | De novo          | 50              | GTR | L 3-4    | 4            | 3          | Radiculopathy            |
| 5       | Facetectomy   | 56          | Schwannoma (WHO grade I)          | 5,2                     | 3         | 19,40             | De novo          | 1100            | GTR | L 3-4    | 4            | 9          | Back pain, radiculopathy |
| 6       | facetectomy   | 50          | Schwannoma (WHO grade I)          | 5,1                     | 3         | 23,8              | Progression      | 150             | GTR | L 2-3    | 4            | 5          | Radiculopathy            |
| 7       | Facet-sparing | 38          | Schwannoma (WHO grade I)          | 0,6                     | 3         | 48,5              | De novo          | 200             | STR | L 2-3    | 5            | 6          | Back pain, sciatica      |
| 8       | Facetectomy   | 41          | Schwannoma (WHO grade I)          | 5,2                     | 3         | 64,9              | De novo          | 900             | GTR | D 11-L 1 | 5            | 5          | Radiculopathy            |
| 9       | Facetectomy   | 38          | Schwannoma (WHO grade 1)          | 3,3                     | 3         | 3,35              | Progression      | 50              | GTR | L 3-4    | 4            | 7          | Radiculopathy            |
| 10      | Facetectomy   | 62          | Schwannoma (WHO grade I)          | 5,4                     | 2         | 2,70              | Progression      | 800             | GTR | L 3-4    | 4            | 5          | Radiculopathy            |
| 11      | Facet-sparing | 55          | Schwannoma (WHO grade I)          | 5,0                     | 2         | 4,37              | De novo          | 50              | STR | L 3-4    | 4            | 8          | Back pain, sciatica      |
| 12      | Facet-sparing | 31          | Schwannoma (WHO grade I)          | 3,8                     | 3         | 7,45              | De novo          | 300             | GTR | L 1-2    | 5            | 8          | Backpain, sciatica       |
| 13      | Facet-sparing | 33          | Schwannoma (WHO grade I)          | 1,7                     | 3         | 2,65              | De novo          | 100             | STR | L 2.3    | 4            | 5          | Back pain, sciatica      |

|    |               |    |                          |     |   |       |             |     |     |           |   |    |                     |
|----|---------------|----|--------------------------|-----|---|-------|-------------|-----|-----|-----------|---|----|---------------------|
| 14 | Facet-sparing | 34 | Schwannoma (WHO grade I) | 3,6 | 3 | 1,58  | Progression | 50  | STR | L 2-3     | 2 | 14 | Back pain, sciatica |
| 15 | Facetectomy   | 49 | Schwannoma (WHO grade I) | 3,6 | 2 | 8,09  | Progression | 200 | GTR | L 2-3     | 5 | 2  | Back pain           |
| 16 | Facet-sparing | 46 | Schwannoma (WHO grade I) | 2,5 | 2 | 17,1  | De novo     | 50  | STR | L 2-3     | 4 | 4  | Back pain, sciatica |
| 17 | Facetectomy   | 23 | Schwannoma (WHO grade I) | 2,3 | 3 | 1,96  | Progression | 200 | GTR | D 12- L 1 | 5 | 3  | Back pain           |
| 18 | Facet-sparing | 21 | Schwannoma (WHO grade I) | 6,3 | 3 | 7,75  | De novo     | 800 | STR | D 12- L 1 | 5 | 6  | Back pain, sciatica |
| 19 | Facetectomy   | 31 | Schwannoma (WHO grade I) | 4,1 | 3 | 11,40 | De novo     | 50  | GTR | L 2-3     | 5 | 4  | Back pain           |
